# Supplementary material
Source: PubMed Central journal article supplement (PMC395942)

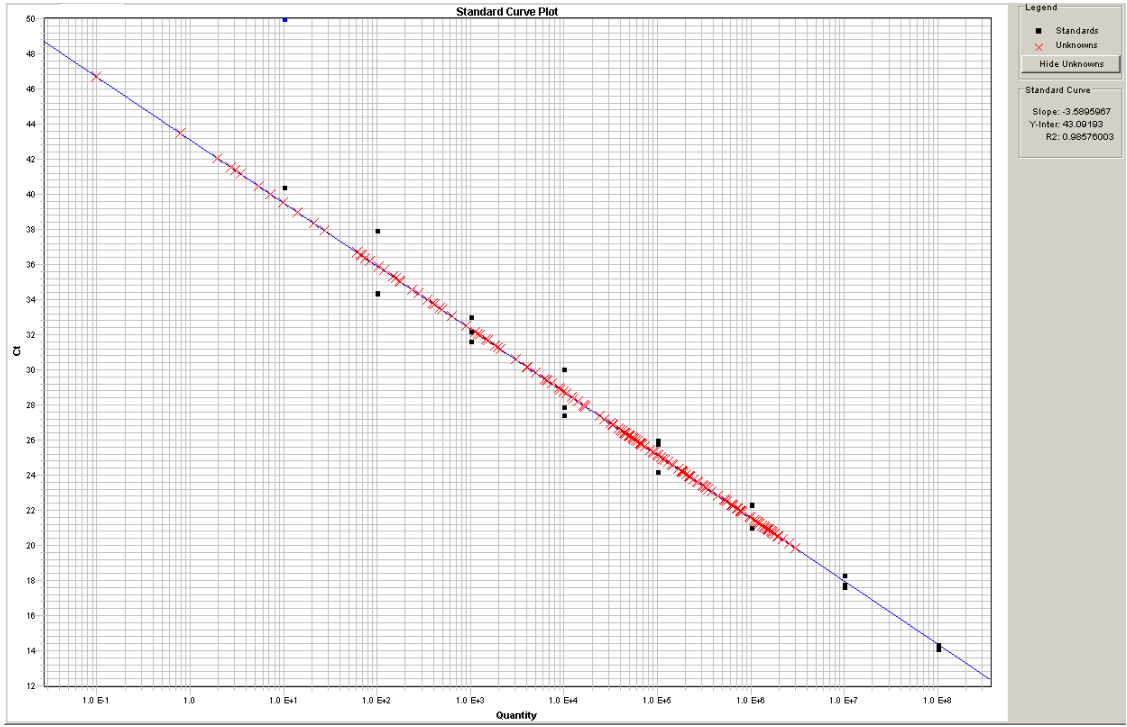

Supplement: pnas_101_16_6176__10.pdf [file pnas_101_16_6176__10.pdf]

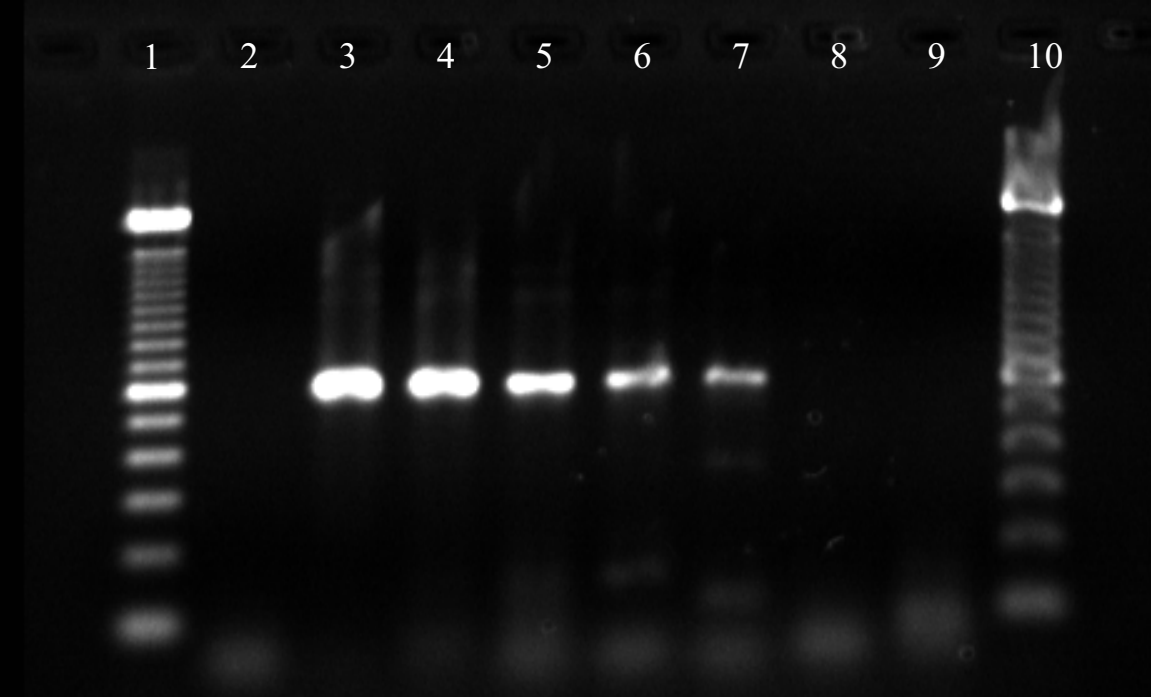

Supplement: pnas_101_16_6176__4.pdf [file pnas_101_16_6176__4.pdf]

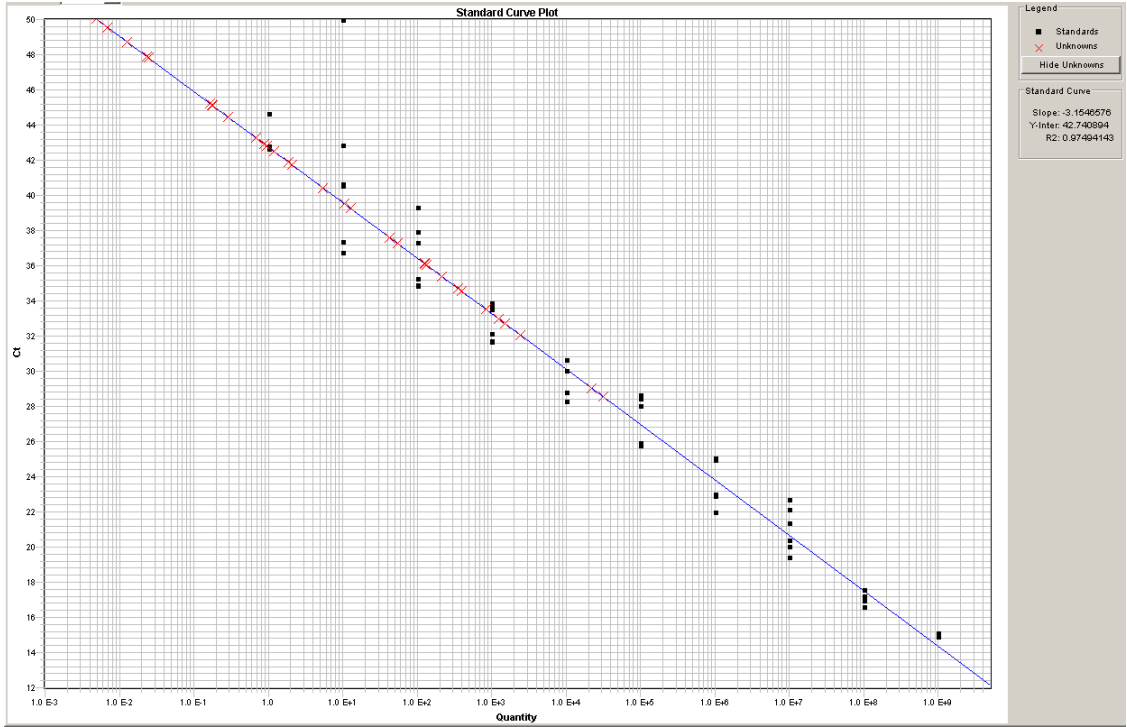

Supplement: pnas_101_16_6176__6.pdf [file pnas_101_16_6176__6.pdf]

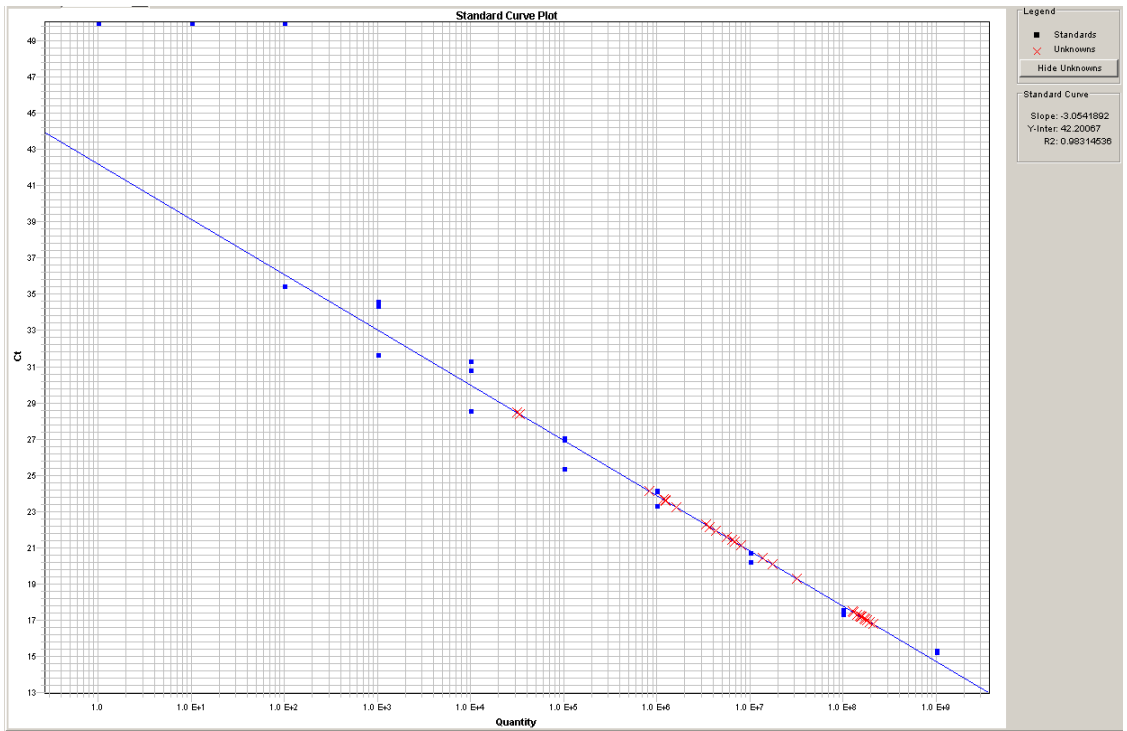

Supplement: pnas_101_16_6176__8.pdf [file pnas_101_16_6176__8.pdf]
